# Supplementary material
Source: ML conference proceedings conference paper supplement (https://proceedings.neurips.cc/paper_files/paper/2023/hash/eeffa70bcbbd43f6bd067edebc6595e8-Abstract.html)
Supplement: Supplementary file 1 [file eeffa70bcbbd43f6bd067edebc6595e8-Supplemental-Conference.zip]

Archive with 2 entries (2 files):
- code.zip
- supp.pdf
